# Supplementary material for: Improving the representation of HONO chemistry in CMAQ and examining its impact on haze over China
Source: Copernicus journal article supplement (doi:10.5194/acp-21-15809-2021), 2021-10-22
Supplement: Supplementary file 1 [file acp-21-15809-2021-supplement.pdf]

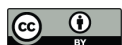

*Supplement of*

## **Improving the representation of HONO chemistry in CMAQ and examining its impact on haze over China**

**Shuping Zhang et al.**

*Correspondence to:* Golam Sarwar ([sarwar.golam@epa.gov](mailto:sarwar.golam@epa.gov)), Jia Xing ([xingjia@tsinghua.edu.cn](mailto:xingjia@tsinghua.edu.cn)), and Hong He ([honghe@rcees.ac.cn](mailto:honghe@rcees.ac.cn))

The copyright of individual parts of the supplement might differ from the article licence.

1 Page S2: Selection of uptake coefficients  
2 Page S2: Calculation of dry deposition velocities  
3 Page S3: Sensitivity analysis  
4

5 Fig. S1 Research history of HONO heterogeneous reactions in past decades  
6 Fig. S2: Observed temperature, relative humidity (RH), wind speed, wind direction,  
7 PM<sub>2.5</sub> and HONO concentrations in Beijing in December 2015.

8 Fig. S3: Average diurnal variation of HONO/NO<sub>2</sub> during 7-22 December in Beijing.

9 Fig. S4: Diurnal variation of sensitivity simulations during 7-22 December in Beijing.

10 HONO observation is denoted as OBS, final simulated HONO concentration is denoted  
11 as REV, HONO with nitrate photolysis rate of 100×JHNO<sub>3</sub> is denoted as 100JNO<sub>3</sub>,  
12 HONO with 2×γ<sub>gn</sub> is denoted as 2γ<sub>gn</sub>, HONO concentration with double NO<sub>x</sub> emission  
13 is denoted as DE, and HONO with one-half of the photolysis rate is denoted as 0.5J.

14 Fig. S5 HONO simulated by default rate coefficients in CB6 (denoted by HONO\_ORI)  
15 and that measured by Chan et al. (1976) (denoted by HONO\_Chan).

16 Fig. S6: A comparison of observed and simulated NO<sub>2</sub> in Beijing (hourly data).

17 Fig. S7: Surface level integrated reaction rates of the six additional HONO reactions in  
18 Beijing December 2015.

19 Fig. S8: Vertical profile of HONO and OH in Beijing simulated for ORI (blue bar) and  
20 REV (orange bar). Full-layer heights above ground are 36, 73, 146, 294, 445, 675, 1072,  
21 1573, 2103, and 2965 m.

22

23 Table S1: A comparison of observed HONO concentrations in China

24 Table S2: The uptake coefficient of NO<sub>2</sub> used in other studies.

25 Table S3: Average VOC concentrations and reaction rates of VOCS with OH in the ORI  
26 and REV models in Beijing

27

## 28 **Selection of uptake coefficients**

29 The selection of uptake coefficients on ground surface and aerosol surface are mainly  
30 based on the empirical data. And we also referred to some experimental data measured  
31 in our laboratory. Experimental data measured on MgO surface fall in the range of 1-  
32  $6 \times 10^{-6}$  as reported by Ma et al. (2017) and on hematite surface in the range of  $1.9 \times 10^{-7}$ -  
33  $1.6 \times 10^{-6}$  as reported by Liu et al. (2015). The derived empirical data obtained by  
34 VandenBoer et al. (2013) from the field observation fall in the range of  $2 \times 10^{-6}$  -  $1.6 \times 10^{-5}$ .  
35 The empirical uptake coefficient used in models varied widely ranging from  $10^{-7}$  to  
36  $10^{-3}$  (Table S2). The majority γ<sub>NO<sub>2</sub></sub> value employed in literature is about  $10^{-6}$ .

37

## 38 **Calculation of dry deposition velocities**

39 The total resistance to dry deposition (which is the inverse of v) is calculated as the sum  
40 of the bulk surface resistance, R<sub>surf</sub>, the aerodynamic resistance, R<sub>a</sub>, the quasi-laminar

41 boundary layer resistance,  $R_{bc}$ .  $R_{surf}$  includes the influence of vegetation, canopy,  
42 ground, etc. Considering the average temperature in our study is around 1.6 °C, we used  
43 the default mechanism of the surface resistance in CMAQ without modification for low  
44 temperatures as suggested in Jaegle's method (-2°C) (Jaeglé et al., 2018). However,  
45 our model calculated deposition velocities fall within the reported ranges of values  
46 (Jaeglé et al., 2018). The modeling value of  $v(\text{HNO}_3)$  falls within the range of  $3 \times 10^{-4}$   
47  $\text{cm s}^{-1}$  to  $4.1 \text{ cm s}^{-1}$  with an average velocity of  $0.5 \text{ cm s}^{-1}$ . The simulated value of  $v(\text{HCl})$   
48 falls in  $1 \times 10^{-4} \text{ cm s}^{-1}$  to  $0.1 \text{ cm s}^{-1}$  with an average velocity of  $0.02 \text{ cm s}^{-1}$ .

$$49 \quad v = (R_{surf} + Ra + R_{bc})^{-1}$$

$$50 \quad R_{bc} = \frac{5}{v \left(\frac{k}{d}\right)^{\frac{2}{3}}}$$

51  $v$  is the cell friction velocity (m/s);  $k$  is kinematic viscosity ( $\text{cm}^2/\text{s}$ );  $d$  is molecular  
52 diffusivity ( $\text{cm}^2/\text{s}$ );

53

#### 54 **Sensitivity analysis**

55 Six additional model sensitivity simulations were performed to better understand the  
56 impacts of selected parameters on HONO predictions. One simulation was to  
57 investigate the sensitivity of the selected night-time uptake coefficient for the  
58 heterogeneous reaction of  $\text{NO}_2$  on ground surface by doubling the uptake coefficient  
59 (from  $4 \times 10^{-6}$  to  $8 \times 10^{-6}$ ). It substantially increases the night-time HONO predictions and  
60 seriously overestimates the observed HONO concentration (Fig. S3). To investigate the  
61 impact of the selected aerosol nitrate photolysis rate, the second simulation was  
62 performed by increasing the aerosol nitrate photolysis rate from  $30 \times \text{HNO}_3$  photolysis  
63 rate to  $100 \times \text{HNO}_3$  photolysis rate. It marginally increases the predicted (12:00 to 18:00)  
64 HONO in the afternoon concentrations from 0.72 ppb to 0.82 ppb (Fig. S3). Model  
65 underestimates daytime  $\text{NO}_2$  concentrations, which can lower the model daytime of  
66 HONO concentrations. Planetary boundary layer (PBL) height affects model daytime  
67 concentration. However, PBL height could not be evaluated because it was not  
68 measured. To investigate the causes of daytime HONO underestimation, the third  
69 sensitivity simulation was performed by doubling the  $\text{NO}_x$  emissions. The  
70 underestimation of the  $\text{NO}_x$  concentration in the afternoon decreases from 39 ppb to 36  
71 ppb, whereas the simulated HONO concentrations in the afternoon (12:00 to 18:00)  
72 increases from 1.0 ppb to 2.4 ppb (Fig. S3). Another possible reason of daytime HONO  
73 underestimation is the overestimation of daytime photolysis reaction rate. Aerosols in  
74 heavy pollution periods can reduce the amount of radiation reaching the ground and can  
75 lower the photolysis reaction rate. The last sensitivity simulation was conducted by  
76 reducing the photolysis rate by 50%. The daytime HONO concentration increases from  
77 1.3 to 2.1 ppb, which improves the comparison with observed data (Fig. S3). Chemical  
78 kinetics of R2 and R3 (Table 1) in CB6 are based on the results of Kaiser and Wu (1977)  
79 which are lower than the values reported by Chan et al. (Chan et al., 1976a; Chan et al.,

80 1976b). We also performed a separate simulation by using the higher rate constants  
81 reported by Chan et al. (1976a, 1976b) (Fig. S4). As expected, the use of higher rate  
82 constants did not change predicted HONO concentrations appreciably which reiterates  
83 that the contribution of gas-phase chemistry to HONO concentration is relatively small.  
84 S/Vg was set to 2.2/H in another sensitivity case. The average HONO increased by 17.2%  
85 (from 2.5 ppb with 1.7/H (HONO\_REV) to 2.9 ppb with 2.2/H). Results of our  
86 sensitivity analyses reveal that the daytime HONO underestimation can be improved  
87 by solving the problem of daytime NO<sub>2</sub> underestimation (Fig. S5) and improving the  
88 HONO photolysis reaction rates. Future studies can target on such improvements.

89  
90  
91 Except the six parameterized reactions, the photolysis of deposited HNO<sub>3</sub>, soil emission  
92 and traffic emission are other potential HONO sources. Zhou et al., (2003) reported that  
93 HNO<sub>3</sub> deposited on environmental surfaces can undergo rapid photolysis leading to  
94 day-time HONO production. Several studies (Sarwar et al., 2008; Fu et al., 2019; Liu  
95 et al., 2019b) included such a reaction in their models. However, we do not include it  
96 because the rate constant has high uncertainty and it could also pose a problem for  
97 performing long-term model simulations. For long-term (annual and multiyear)  
98 simulation, that the deposited amount of HNO<sub>3</sub> could accumulate with time, which  
99 could continue increasing the HONO production rates with time. Soil can emit HONO  
100 and other nitrogen-containing compounds (Su et al., 2011; Oswald et al., 2013). Rasool  
101 et al. (2019) implemented these emissions into CMAQv5.3 by using a mechanistic  
102 representation of the underlying processes and examined their impacts on air quality  
103 over North America. The impacts of HONO emitted from soil are generally low, and  
104 we do not include these emissions in this study. Traffic emissions are usually estimated  
105 from the ratio of HONO/NO<sub>x</sub>, ranging from 0.3% to 2.1% (Kurtenbach et al., 2001;  
106 Svoboda et al., 2013; Czader et al., 2015; Wormhoudt et al., 2015; Xu et al., 2015; Liang  
107 et al., 2017; Nakashima and Kajii, 2017; Trinh et al., 2017; Rasool et al., 2019). The  
108 HONO/NO<sub>x</sub> emission ratio used in CMAQv5.3 (0.8%) falls within the reported ranges.  
109 Some researchers classify the reaction between vehicle-emitted NO and OH as traffic  
110 source. Our research emphasizes the contribution of each chemical reaction including  
111 NO+OH, and does not investigate the differences in traffic sources. We also applied our  
112 parameter method into another case at Wangdu in winter of 2017. The simulated HONO  
113 improves remarkably (Zheng et al., 2020).

114

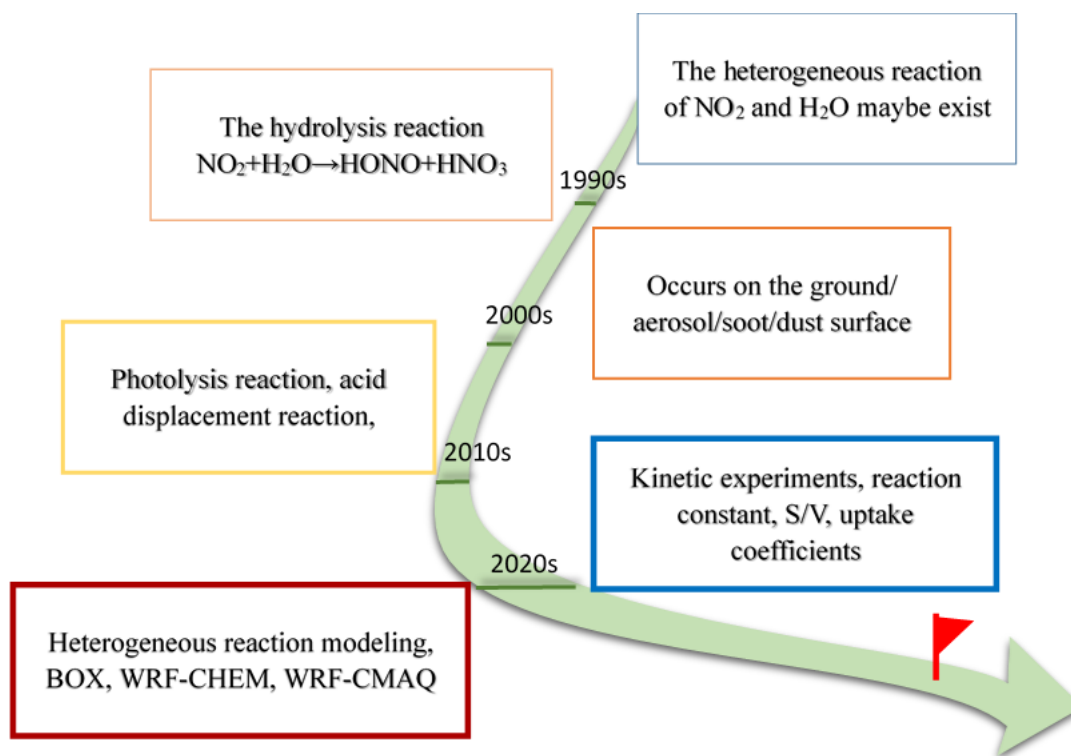

115

116 Fig. S1 Research history of HONO heterogeneous reactions in past decades

117

118

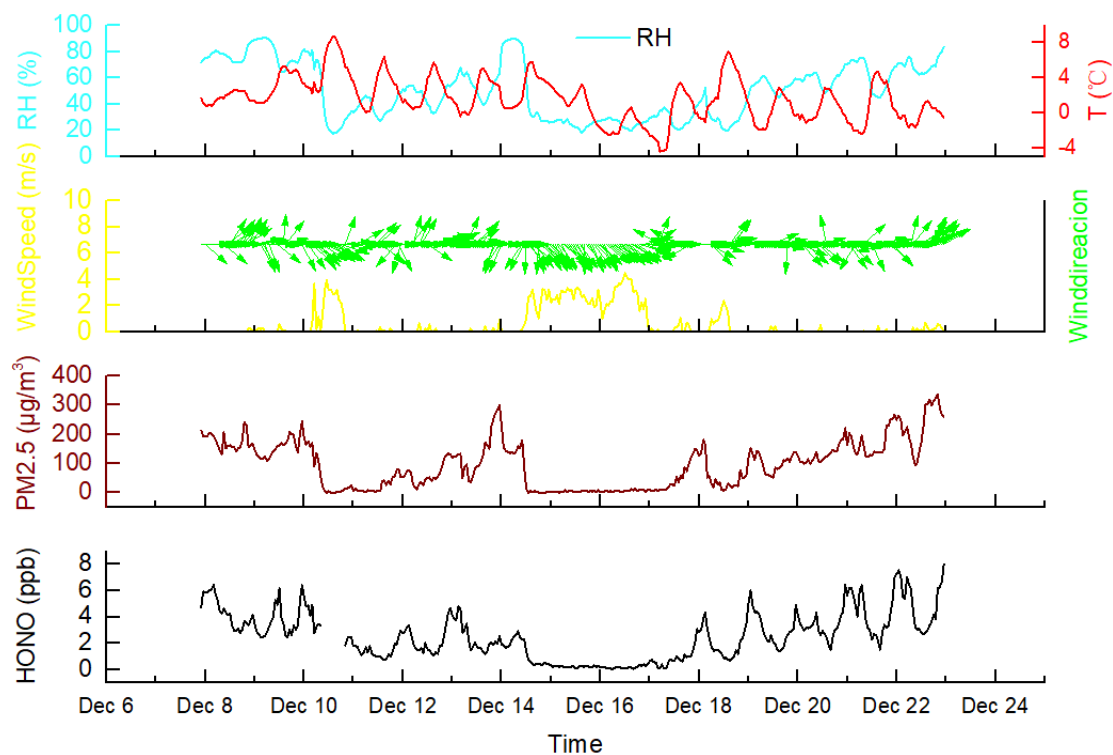

119

120 Fig. S2: Observed temperature, relative humidity (RH), wind speed, wind direction,  
121 PM<sub>2.5</sub>, and HONO concentrations in Beijing in December 2015.

122

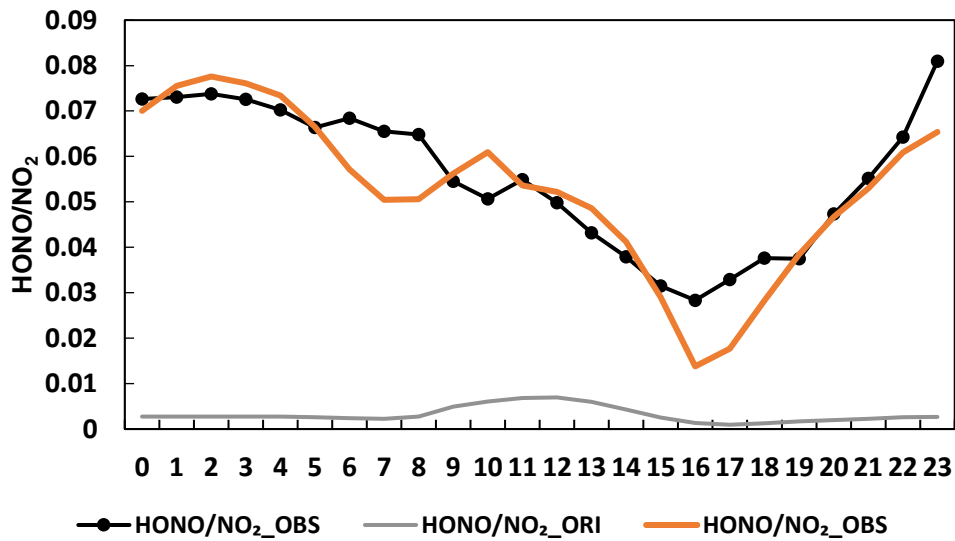

124

125

Fig. S3: Average diurnal variation of HONO/NO<sub>2</sub> during 7-22 December in Beijing.

126

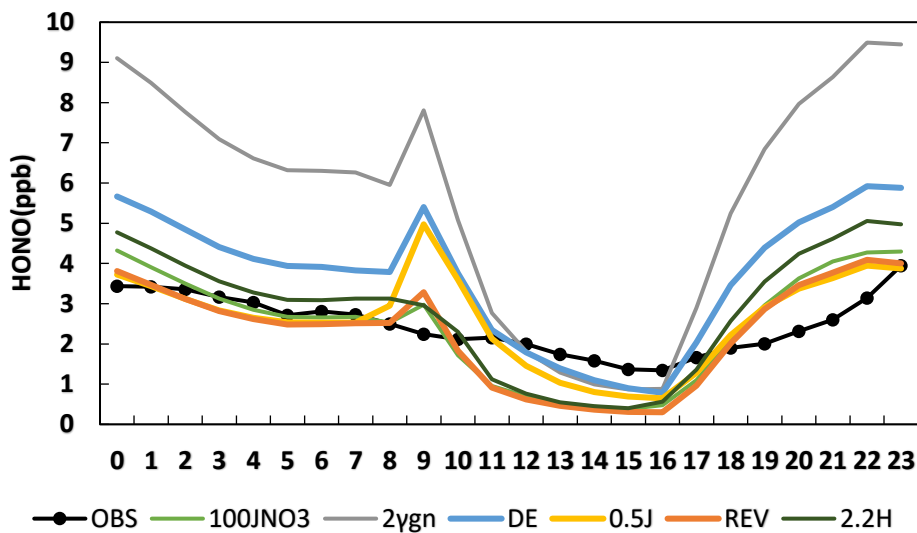

127

128

Fig. S4: Diurnal variation of sensitivity simulations during 7-22 December in Beijing.

129

HONO observation is denoted as OBS, final simulated HONO concentration is denoted

130

as REV, HONO with nitrate photolysis rate of 100×JHNO<sub>3</sub> is denoted as 100JNO<sub>3</sub>,

131

HONO with 2×γgn is denoted as 2γgn, HONO concentration with double NO<sub>x</sub> emission

132

is denoted as DE, HONO with 2.2/H is denoted as 2.2H and HONO with one-half of

133

the photolysis rate is denoted as 0.5J.

134

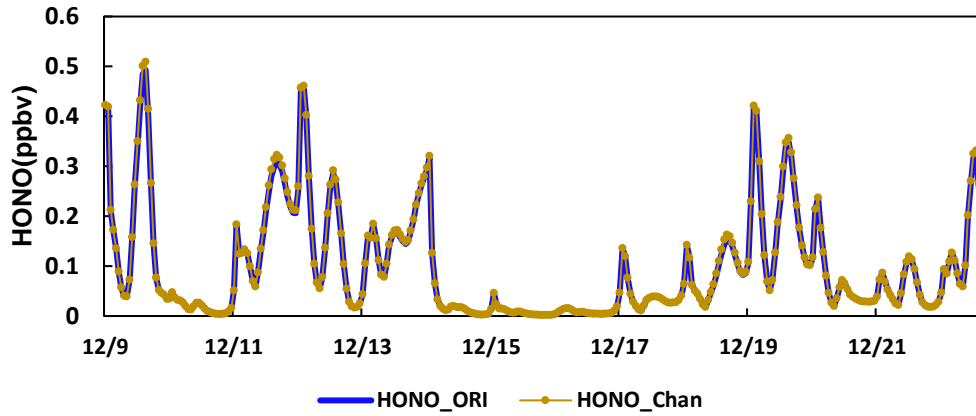

135  
136  
137  
138

Fig.S5 HONO simulated by default rate coefficients in CB6 (denoted by HONO\_ORI) and that measured by Chan et al (1976) (denoted by HONO\_Chan ).

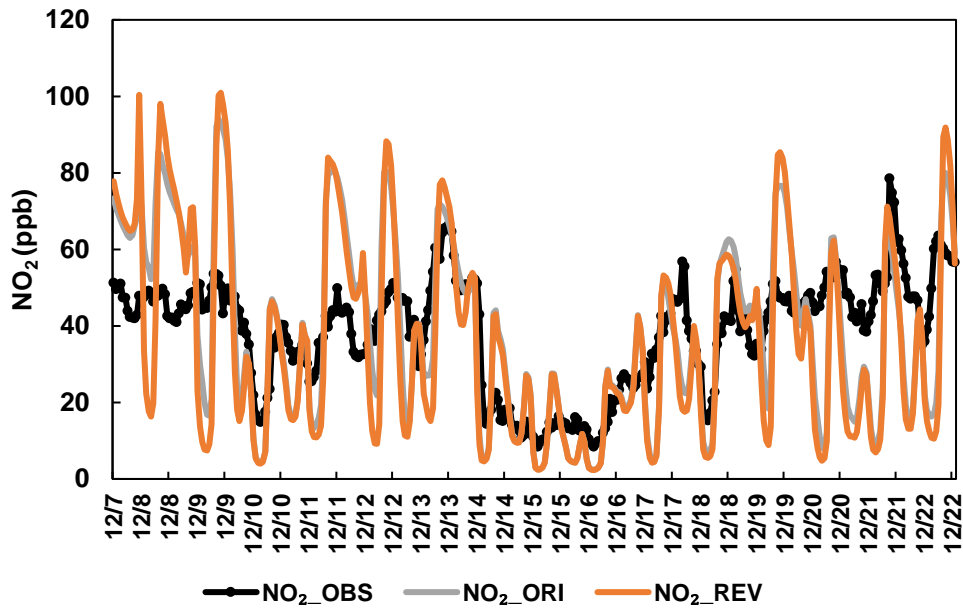

139  
140  
141

Fig. S6: A comparison of observed and simulated NO<sub>2</sub> in Beijing (hourly data).

142

143

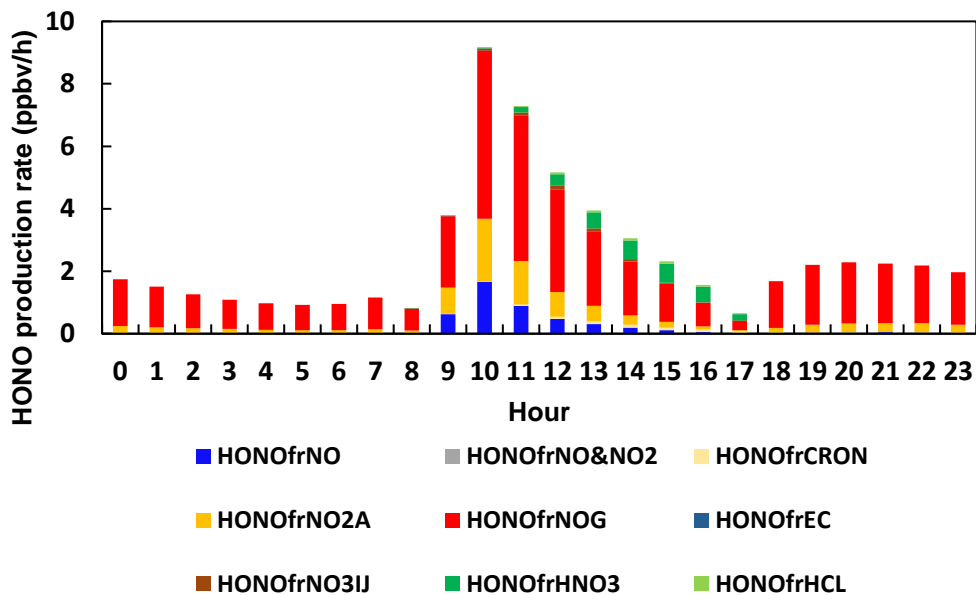

144

145 Fig. S7: Surface level integrated reaction rates of the six additional HONO reactions  
146 in Beijing December 2015.

147

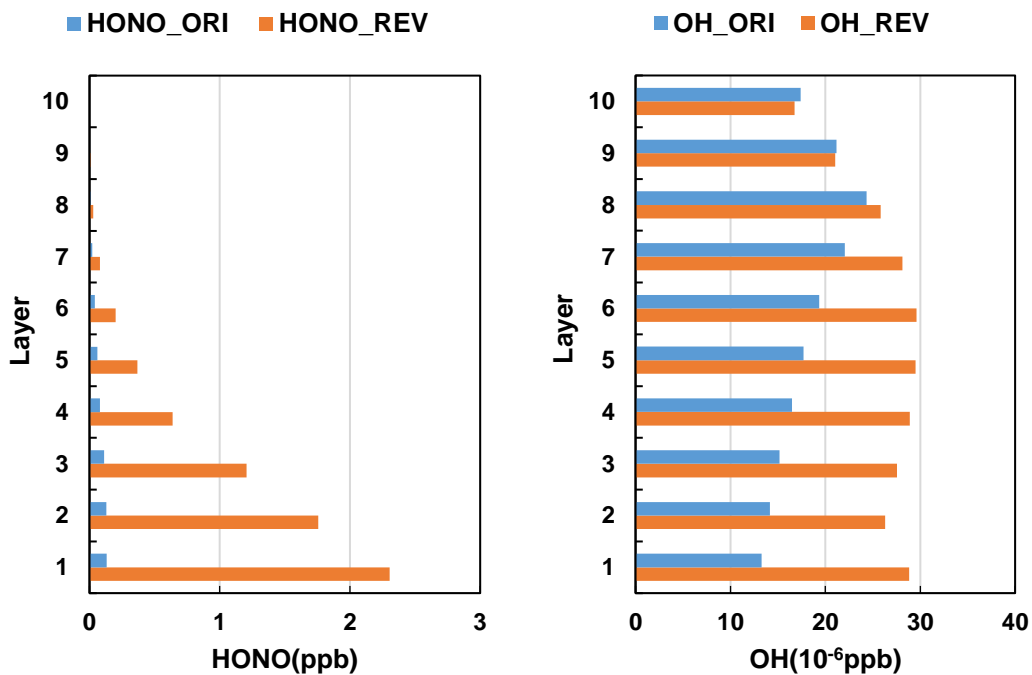

148

149 Fig. S8: Vertical profile of HONO and OH in Beijing simulated for ORI (blue bar) and  
150 REV (orange bar). Full-layer heights above ground are 36, 73, 146, 294, 445, 675, 1072,  
151 1573, 2103, and 2965 m.

152

153



154 Table S1: A comparison of observed HONO concentrations in China

| Station   | Time                      | Equipment             | HONO (ppb) | Reference             |
|-----------|---------------------------|-----------------------|------------|-----------------------|
| Heshan    | Jan 4-8, 2017             | LOPAP                 | 0.2-8.8    | (Fu et al., 2019)     |
| Chengdu   | Sep 1-Dec 30, 2017        | GAC-IC TH-<br>PKU-303 | 0.3-1      | (Wu et al., 2018)     |
| Xi'an     | Dec 16-24, 2015           | IGAC                  | 0.5-4      | (Feng et al., 2018)   |
| Shanghai  | May 12-28, 2016           | LOPAP                 | 0.3-6      | (Cui et al., 2018)    |
| Xianggang | Aug 20-31, 2011           | LOPAP                 | 0.45-2.71  | (Zhang et al., 2016)  |
| Beijing   | Dec 16-23, 2016           | custom                | 3.5±2.7    | (Zhang et al., 2019b) |
| Jinan     | Sep 1, 2015-Aug 31, 2016  | LOPAP                 | 17-8.36    | (Li et al., 2018a)    |
| Beijing   | Aug 2-30, 2006            | LOPAP                 | 0.06-3     | (Zhang et al., 2019a) |
| Beijing   | Sep 22, 2015-Jul 25, 2016 | AIM-IC<br>(custom)    | 1.05-2.27  | (Wang et al., 2017)   |
| Beijing   | Feb 22-Mar 2, 2014        | custom                | 0.49-3.24  | (Hou et al., 2016)    |
| Beijing   | Oct 28-Nov 2, 2014        | custom                | 0.54-2.7   | (Tong et al., 2016)   |
| Beijing   | Dec 7-22, 2015            | custom                | 2.3±1.8    | This study            |

155

156

157

Table S2: The uptake coefficient of NO<sub>2</sub> used in other studies.

| $\gamma_{\text{NO}_2}$ | reference               | $\gamma_{\text{NO}_2}$    | reference              |
|------------------------|-------------------------|---------------------------|------------------------|
| $1 \times 10^{-6}$     | (Li et al., 2018a)      | $8 \times 10^{-6}$        | (Liu et al., 2019b)    |
| $1 \times 10^{-5}$     | (Fu et al., 2019)       | $1 \times 10^{-6}$        | (Liu et al., 2014)     |
| $1 \times 10^{-6}$     | (Ndour et al., 2008)    | $2 \sim 7 \times 10^{-4}$ | (Lu et al., 2018)      |
| $1 \times 10^{-7}$     | (Stemmler et al., 2007) | $5 \times 10^{-6}$        | (Meng et al., 2020)    |
| $10^{-3} \sim 10^{-4}$ | (Li et al., 2018b)      | $1 \sim 6 \times 10^{-7}$ | (Monge et al., 2010)   |
| $1 \times 10^{-6}$     | (Liu et al., 2019a)     | $3 \times 10^{-5}$        | (Spataro et al., 2013) |
| $1 \times 10^{-6}$     | (Liu et al., 2021)      |                           |                        |

158

159

160 Table S3: Average VOC concentrations and reaction rates of VOCS with OH in the ORI  
161 and REV models in Beijing

162

|                  | Conc (ppb) |         | $R_{\text{VOC}+\text{OH}}$ (ppt/h) |          |
|------------------|------------|---------|------------------------------------|----------|
|                  | ORI        | REV     | ORI                                | REV      |
| Acetaldehyde     | 2.46       | ⇒ 2.80  | 58.37                              | ⇒ 123.06 |
| Higher-aldehydes | 2.79       | ⇒ 2.95  | 63.18                              | ⇒ 124.11 |
| Ethene           | 14.19      | ⇐ 13.44 | 53.06                              | ⇒ 83.94  |
| Ethane           | 14.91      | ⇐ 14.89 | 1.28                               | ⇒ 2.46   |
| Ethanol          | 0.78       | ⇐ 0.75  | 1.36                               | ⇒ 2.39   |
| Formaldehyde     | 11.63      | ⇒ 12.44 | 75.56                              | ⇒ 163.75 |

|                 |        |   |        |        |   |        |
|-----------------|--------|---|--------|--------|---|--------|
| Internal olefin | 0.81   | ⇐ | 0.69   | 7.42   | ⇐ | 6.98   |
| Isoprene        | 0.04   | = | 0.04   | 1.10   | ⇐ | 1.01   |
| Methanol        | 1.13   | = | 1.13   | 0.47   | ⇒ | 0.88   |
| Olefin          | 25.13  | ⇐ | 23.30  | 258.53 | ⇒ | 332.31 |
| Paraffin        | 186.06 | ⇐ | 182.60 | 80.94  | ⇒ | 144.42 |
| Monoterpenes    | 0.03   | ⇐ | 0.02   | 0.35   | ⇐ | 0.21   |
| Toluene         | 17.24  | ⇐ | 16.57  | 51.83  | ⇒ | 86.36  |
| Xylene          | 16.83  | ⇐ | 15.84  | 123.51 | ⇒ | 179.99 |

---

163

164

## 165 References

166 Chan, W.H., Nordstrom, R.J., Calvert, J.G., Shaw, J.H., 1976a. Kinetic study of nitrous acid formation  
167 and decay reactions in gaseous mixtures of nitrous acid, nitrogen oxide (NO), nitrogen oxide (NO<sub>2</sub>),  
168 water, and nitrogen. *Environmental Science & Technology* 10, 674-682.

169 Chan, W.H., Nordstrom, R.J., Galvert, J.G., Shaw, J.H., 1976b. An IRFTS spectroscopic study of the  
170 kinetics and the mechanism of the reactions in the gaseous system, HONO, NO, NO<sub>2</sub>, H<sub>2</sub>O. *Chemical*  
171 *Physics Letters* 37, 441-446.

172 Cui, L.L., Li, R., Zhang, Y.C., Meng, Y., Fu, H.B., Chen, J.M., 2018. An observational study of nitrous  
173 acid (HONO) in Shanghai, China: The aerosol impact on HONO formation during the haze episodes.  
174 *Sci. Total Environ.* 630, 1057-1070.

175 Czader, B.H., Choi, Y., Li, X., Alvarez, S., Lefer, B., 2015. Impact of updated traffic emissions on HONO  
176 mixing ratios simulated for urban site in Houston, Texas. *Atmospheric Chemistry and Physics* 15, 1253-  
177 1263.

178 Feng, T., Bei, N., Zhao, S., Wu, J., Li, X., Zhang, T., Cao, J., Zhou, W., Li, G., 2018. Wintertime nitrate  
179 formation during haze days in the Guanzhong basin, China: A case study. *Environmental pollution* 243,  
180 1057-1067.

181 Fu, X., Wang, T., Zhang, L., Li, Q.Y., Wang, Z., Xia, M., Yun, H., Wang, W.H., Yu, C., Yue, D.L., Zhou,  
182 Y., Zheng, J.Y., Han, R., 2019. The significant contribution of HONO to secondary pollutants during a  
183 severe winter pollution event in southern China. *Atmospheric Chemistry and Physics* 19, 1-14.

184 Hou, S., Tong, S., Ge, M., An, J., 2016. Comparison of atmospheric nitrous acid during severe haze and  
185 clean periods in Beijing, China. *Atmospheric Environment* 124, 199-206.

186 Jaeglé, L., Shah, V., Thornton, J.A., Lopez-Hilfiker, F.D., Lee, B.H., McDuffie, E.E., Fibiger, D., Brown,  
187 S.S., Veres, P., Sparks, T.L., Ebben, C.J., Wooldridge, P.J., Kenagy, H.S., Cohen, R.C., Weinheimer, A.J.,  
188 Campos, T.L., Montzka, D.D., Digangi, J.P., Wolfe, G.M., Hanisco, T., Schroder, J.C., Campuzano-Jost,  
189 P., Day, D.A., Jimenez, J.L., Sullivan, A.P., Guo, H., Weber, R.J., 2018. Nitrogen Oxides Emissions,  
190 Chemistry, Deposition, and Export Over the Northeast United States During the WINTER Aircraft  
191 Campaign. *Journal of Geophysical Research: Atmospheres* 123, 3123-3139.

192 Kaiser, E.W., Wu, C.H., 1977. A kinetic study of the gas phase formation and decomposition reactions  
193 of nitrous acid. *The Journal of Physical Chemistry* 81, 1701-1706.

194 Kurtenbach, R., Becker, K., Gomes, J., Kleffmann, J., Lörzer, J., Spittler, M., Wiesen, P., Ackermann, R.,  
195 Geyer, A., Platt, U., 2001. Investigations of emissions and heterogeneous formation of HONO in a road  
196 traffic tunnel. *Atmospheric Environment* 35, 3385-3394.

197 Li, D.D., Xue, L.K., Wen, L., Wang, X.F., Chen, T.S., Mellouki, A., Chen, J.M., Wang, W.X., 2018a.  
198 Characteristics and sources of nitrous acid in an urban atmosphere of northern China: Results from 1-yr  
199 continuous observations. *Atmospheric Environment* 182, 296-306.

200 Li, L.J., Hoffmann, M.R., Colussi, A.J., 2018b. Role of Nitrogen Dioxide in the Production of Sulfate  
201 during Chinese Haze-Aerosol Episodes. *Environmental Science & Technology* 52, 2686-2693.

202 Liang, Y., Zha, Q., Wang, W., Cui, L., Lui, K.H., Ho, K.F., Wang, Z., Lee, S.-c., Wang, T., 2017.  
203 Revisiting nitrous acid (HONO) emission from on-road vehicles: A tunnel study with a mixed fleet. *J.*  
204 *Air Waste Manage. Assoc.* 67, 797-805.

205 Liu, J., Li, S., Mekic, M., Jiang, H., Zhou, W., Loisel, G., Song, W., Wang, X., Gligorovski, S., 2019a.  
206 Photoenhanced Uptake of NO<sub>2</sub> and HONO Formation on Real Urban Grime. *Environmental Science &*  
207 *Technology Letters*.

208 Liu, J., Liu, Z., Ma, Z., Yang, S., Yao, D., Zhao, S., Hu, B., Tang, G., Sun, J., Cheng, M., Xu, Z., Wang,  
209 Y., 2021. Detailed budget analysis of HONO in Beijing, China: Implication on atmosphere oxidation  
210 capacity in polluted megacity. *Atmospheric Environment* 244.

211 Liu, Y., Han, C., Ma, J., Bao, X., He, H., 2015. Influence of relative humidity on heterogeneous kinetics  
212 of NO<sub>2</sub> on kaolin and hematite. *Physical Chemistry Chemical Physics* 17, 19424-19431.

213 Liu, Y., Lu, K., Li, X., Dong, H., Tan, Z., Wang, H., Zou, Q., Wu, Y., Zeng, L., Hu, M., Min, K.-E.,  
214 Kecorius, S., Wiedensohler, A., Zhang, Y., 2019b. A Comprehensive Model Test of the HONO Sources  
215 Constrained to Field Measurements at Rural North China Plain. *Environmental Science & Technology*  
216 53, 3517-3525.

217 Liu, Z., Wang, Y., Costabile, F., Amoroso, A., Zhao, C., Huey, L.G., Stickel, R., Liao, J., Zhu, T., 2014.  
218 Evidence of Aerosols as a Media for Rapid Daytime HONO Production over China. *Environmental*  
219 *Science & Technology* 48, 14386-14391.

220 Lu, X.C., Wang, Y.H., Li, J.F., Shen, L., Fung, J.C.H., 2018. Evidence of heterogeneous HONO formation  
221 from aerosols and the regional photochemical impact of this HONO source. *Environ. Res. Lett.* 13, 12.

222 Ma, Q.X., Wang, T., Liu, C., He, H., Wang, Z., Wang, W.H., Liang, Y.T., 2017. SO<sub>2</sub> Initiates the Efficient  
223 Conversion of NO<sub>2</sub> to HONO on MgO Surface. *Environmental Science & Technology* 51, 3767-3775.

224 Meng, F., Qin, M., Tang, K., Duan, J., Fang, W., Liang, S., Ye, K., Xie, P., Sun, Y., Xie, C., Ye, C., Fu, P.,  
225 Liu, J., Liu, W., 2020. High-resolution vertical distribution and sources of HONO and  
226 NO<sub>2</sub> in the nocturnal boundary layer in urban Beijing, China. *Atmospheric*  
227 *Chemistry and Physics* 20, 5071-5092.

228 Monge, M., D'Anna, B., Mazri, L., Giroir-Fendler, A., Ammann, M., Donaldson, D.J., George, C., 2010.  
229 Light changes the atmospheric reactivity of soot. *Proceedings of the National Academy of Sciences of*  
230 *the United States of America* 107, 6605-6609.

231 Nakashima, Y., Kajii, Y., 2017. Determination of nitrous acid emission factors from a gasoline vehicle  
232 using a chassis dynamometer combined with incoherent broadband cavity-enhanced absorption  
233 spectroscopy. *Sci. Total Environ.* 575, 287-293.

234 Ndour, M., D'Anna, B., George, C., Ka, O., Balkanski, Y., Kleffmann, J., Stemmler, K., Ammann, M.,  
235 2008. Photoenhanced uptake of NO<sub>2</sub> on mineral dust: Laboratory experiments and model simulations.  
236 *Geophysical Research Letters* 35.

237 Oswald, R., Behrendt, T., Ermel, M., Wu, D., Su, H., Cheng, Y., Breuninger, C., Moravek, A., Mougín,  
238 E., Delon, C., 2013. HONO emissions from soil bacteria as a major source of atmospheric reactive  
239 nitrogen. *Science* 341, 1233-1235.

240 Rasool, Q.Z., Bash, J.O., Cohan, D.S., 2019. Mechanistic representation of soil nitrogen emissions in the

241 Community Multiscale Air Quality (CMAQ) model v 5.1. *Geosci Model Dev* 12, 849-878.

242 Sarwar, G., Roselle, S.J., Mathur, R., Appel, W., Dennis, R.L., Vogel, B., 2008. A comparison of CMAQ  
243 HONO predictions with observations from the northeast oxidant and particle study. *Atmospheric*  
244 *Environment* 42, 5760-5770.

245 Spataro, F., Ianniello, A., Esposito, G., Allegrini, I., Zhu, T., Hu, M., 2013. Occurrence of atmospheric  
246 nitrous acid in the urban area of Beijing (China). *Sci. Total Environ.* 447, 210-224.

247 Stemmler, K., Ndour, M., Elshorbany, Y., Kleffmann, J., D'Anna, B., George, C., Bohn, B., Ammann, M.,  
248 2007. Light induced conversion of nitrogen dioxide into nitrous acid on submicron humic acid aerosol.  
249 *Atmos. Chem. Phys.* 7, 4237-4248.

250 Su, H., Cheng, Y., Oswald, R., Behrendt, T., Trebs, I., Meixner, F.X., Andreae, M.O., Cheng, P., Zhang,  
251 Y., Pöschl, U., 2011. Soil Nitrite as a Source of Atmospheric HONO and OH Radicals. *Science* 333, 1616.

252 Svoboda, O., Kubelová, L., Slavíček, P., 2013. Enabling Forbidden Processes: Quantum and Solvation  
253 Enhancement of Nitrate Anion UV Absorption. *The Journal of Physical Chemistry A* 117, 12868-12877.

254 Tong, S., Hou, S., Zhang, Y., Chu, B., Liu, Y., He, H., Zhao, P., Ge, M., 2016. Exploring the nitrous acid  
255 (HONO) formation mechanism in winter Beijing: direct emissions and heterogeneous production in  
256 urban and suburban areas. *Faraday discussions* 189, 213-230.

257 Trinh, H.T., Imanishi, K., Morikawa, T., Hagino, H., Takenaka, N., 2017. Gaseous nitrous acid (HONO)  
258 and nitrogen oxides (NOx) emission from gasoline and diesel vehicles under real-world driving test  
259 cycles. *J. Air Waste Manage. Assoc.* 67, 412-420.

260 VandenBoer, T.C., Brown, S.S., Murphy, J.G., Keene, W.C., Young, C.J., Pszenny, A.A.P., Kim, S.,  
261 Warneke, C., de Gouw, J.A., Maben, J.R., Wagner, N.L., Riedel, T.P., Thornton, J.A., Wolfe, D.E., Dubé,  
262 W.P., Öztürk, F., Brock, C.A., Grossberg, N., Lefer, B., Lerner, B., Middlebrook, A.M., Roberts, J.M.,  
263 2013. Understanding the role of the ground surface in HONO vertical structure: High resolution vertical  
264 profiles during NACHTT-11. *Journal of Geophysical Research: Atmospheres* 118, 10,155-110,171.

265 Wang, G., Cheng, S., Wei, W., Yang, X., Wang, X., Jia, J., Lang, J., Lv, Z., 2017. Characteristics and  
266 emission-reduction measures evaluation of PM<sub>2.5</sub> during the two major events: APEC and Parade. *The*  
267 *Science of the total environment* 595, 81-92.

268 Wormhoudt, J., Wood, E.C., Knighton, W.B., Kolb, C.E., Herndon, S.C., Olaguer, E.P., 2015. Vehicle  
269 emissions of radical precursors and related species observed in the 2009 SHARP campaign. *J. Air Waste*  
270 *Manage. Assoc.* 65, 699-706.

271 Wu, P., Huang, X., Zhang, J., Luo, B., Luo, J., Song, H., Zhang, W., Rao, Z., Feng, Y., Zhang, J., 2018.  
272 Characteristics and formation mechanisms of autumn haze pollution in Chengdu based on high time-  
273 resolved water-soluble ion analysis. *Environmental science and pollution research international.*

274 Xu, Z., Wang, T., Wu, J., Xue, L., Chan, J., Zha, Q., Zhou, S., Louie, P.K.K., Luk, C.W.Y., 2015. Nitrous  
275 acid (HONO) in a polluted subtropical atmosphere: Seasonal variability, direct vehicle emissions and  
276 heterogeneous production at ground surface. *Atmospheric Environment* 106, 100-109.

277 Zhang, J.W., An, J.L., Qu, Y., Liu, X.G., Chen, Y., 2019a. Impacts of potential HONO sources on the  
278 concentrations of oxidants and secondary organic aerosols in the Beijing-Tianjin-Hebei region of China.  
279 *Sci. Total Environ.* 647, 836-852.

280 Zhang, L., Wang, T., Zhang, Q., Zheng, J.Y., Xu, Z., Lv, M.Y., 2016. Potential sources of nitrous acid  
281 (HONO) and their impacts on ozone: A WRF-Chem study in a polluted subtropical region. *J. Geophys.*  
282 *Res.-Atmos.* 121, 3645-3662.

283 Zhang, W.Q., Tong, S.R., Ge, M.F., An, J.L., Shi, Z.B., Hou, S.Q., Xia, K.H., Qu, Y., Zhang, H.X., Chu,  
284 B.W., Sun, Y.L., He, H., 2019b. Variations and sources of nitrous acid (HONO) during a severe pollution

285 episode in Beijing in winter 2016. *Sci. Total Environ.* 648, 253-262.  
286 Zheng, H., Song, S., Sarwar, G., Gen, M., Wang, S., Ding, D., Chang, X., Zhang, S., Xing, J., Sun, Y., Ji,  
287 D., Chan, C.K., Gao, J., McElroy, M.B., 2020. Contribution of Particulate Nitrate Photolysis to  
288 Heterogeneous Sulfate Formation for Winter Haze in China. *Environmental Science & Technology*  
289 *Letters*.  
290 Zhou, X., Gao, H., He, Y., Huang, G., Bertman, S.B., Civerolo, K., Schwab, J., 2003. Nitric acid  
291 photolysis on surfaces in low-NO<sub>x</sub> environments: Significant atmospheric implications. *Geophysical*  
292 *Research Letters* 30.  
293
